# Supplementary material
Source: publisher figshare collection journal article supplement (https://acs.figshare.com/ndownloader/files/5180590)

**First Diamino *Daphniphyllum* Alkaloid, Daphnipaxinin, with An  
Unprecedented Heterohexacyclic Skeleton from *Daphniphyllum*  
*paxianum***

Sheng-Ping Yang and Jian-Min Yue\*

*State Key Laboratory of Drug Research, Institute of Materia Medica, Shanghai  
Institutes for Biological Sciences, Chinese Academy of Sciences, 555 Zu Chong Zhi  
Road, Zhangjiang Hi-Tech Park, Shanghai, 201203, P. R. China*

**Supporting Information**

Figure S2. Experimental Section S2.

Figure S3.  $^1\text{H}$  NMR spectrum of daphnipaxinin (**1**) in  $\text{CD}_3\text{OD}$ .

Figure S4.  $^{13}\text{C}$  NMR spectrum of daphnipaxinin (**1**) in  $\text{CD}_3\text{OD}$ .

Figure S5. DEPT spectrum of daphnipaxinin (**1**) in  $\text{CD}_3\text{OD}$ .

Figure S6. EIMS spectrum of daphnipaxinin (**1**).

Figure S7. ESI MS (positive) spectrum of daphnipaxinin (**1**).

Figure S8. ESI MS (negative) spectrum of daphnipaxinin (**1**).

Figure S9.  $^1\text{H}$ - $^1\text{H}$  COSY spectrum of daphnipaxinin (**1**) in  $\text{CD}_3\text{OD}$ .

Figure S10. Expanded  $^1\text{H}$ - $^1\text{H}$  COSY spectrum of daphnipaxinin (**1**) in  $\text{CD}_3\text{OD}$  ( $\delta$  2.0-3.6).

Figure S11. Expanded  $^1\text{H}$ - $^1\text{H}$  COSY spectrum of daphnipaxinin (**1**) in  $\text{CD}_3\text{OD}$  ( $\delta$  1.35-2.73).

Figure S12. HMQC spectrum of daphnipaxinin (**1**) in  $\text{CD}_3\text{OD}$ .

Figure S13. HMBC spectrum of daphnipaxinin (**1**) in  $\text{CD}_3\text{OD}$ .

Figure S14. Expanded HMBC spectrum of daphnipaxinin (**1**) in  $\text{CD}_3\text{OD}$  ( $\delta_{\text{H}}$  1.2-2.95 vs  $\delta_{\text{C}}$  109.5-210).

Figure S15. Expanded HMBC spectrum of daphnipaxinin (**1**) in  $\text{CD}_3\text{OD}$  ( $\delta_{\text{H}}$  3.05-4.46 vs  $\delta_{\text{C}}$  109.5-210).

Figure S16. NOESY spectrum of daphnipaxinin (**1**) in  $\text{CD}_3\text{OD}$ .

Figure S17. IR (KBr disc) spectrum of daphnipaxinin (**1**).

### Experimental Section

**General Procedures:** Melting point was recorded on Fisher-Johns melting point apparatus. Optical rotation was determined on a Perkin-Elmer 341 polarimeter. UV and CD spectra were measured on a JASCO J-810 instrument. IR spectra were recorded on a Perkin-Elmer 577 spectrometer. NMR spectra were measured on a Bruker AM-400 spectrometer with TMS as internal standard. EIMS (70 eV) and ESI MS were carried out on a Finnigan MAT 95 mass spectrometer, and a Finnigan LCQ<sup>DECA</sup> and a Q-TOF Ultima (for HRESIMS) instruments, respectively. All solvents used were of analytical grade (Shanghai Chemical Plant). Silica gel (200-300 mesh) was used for column chromatography, and pre-coated silica gel GF<sub>254</sub> plates (Qingdao Haiyang Chemical Plant) were used for TLC. Sephadex LH-20 (Pharmacia Biotech, Sweden) was also used for column chromatography.

**Plant Material:** *Daphniphyllum paxianum* Rosenth was collected from Island Hainan of P. R. China and authenticated by Prof. Su-Hua Shi of Institute of Botany, School of Life science, Zhongshan University of P. R. China. A voucher specimen has been deposited in the Herbarium of Institute of *Materia Medica*, Shanghai Institute for Biological Sciences, Chinese Academy of Sciences (accession number: DS-2003-4Y-HN).

Figure S3.  $^1\text{H}$  NMR spectrum of daphnipaxinin (1) in  $\text{CD}_3\text{OD}$ 

Hz

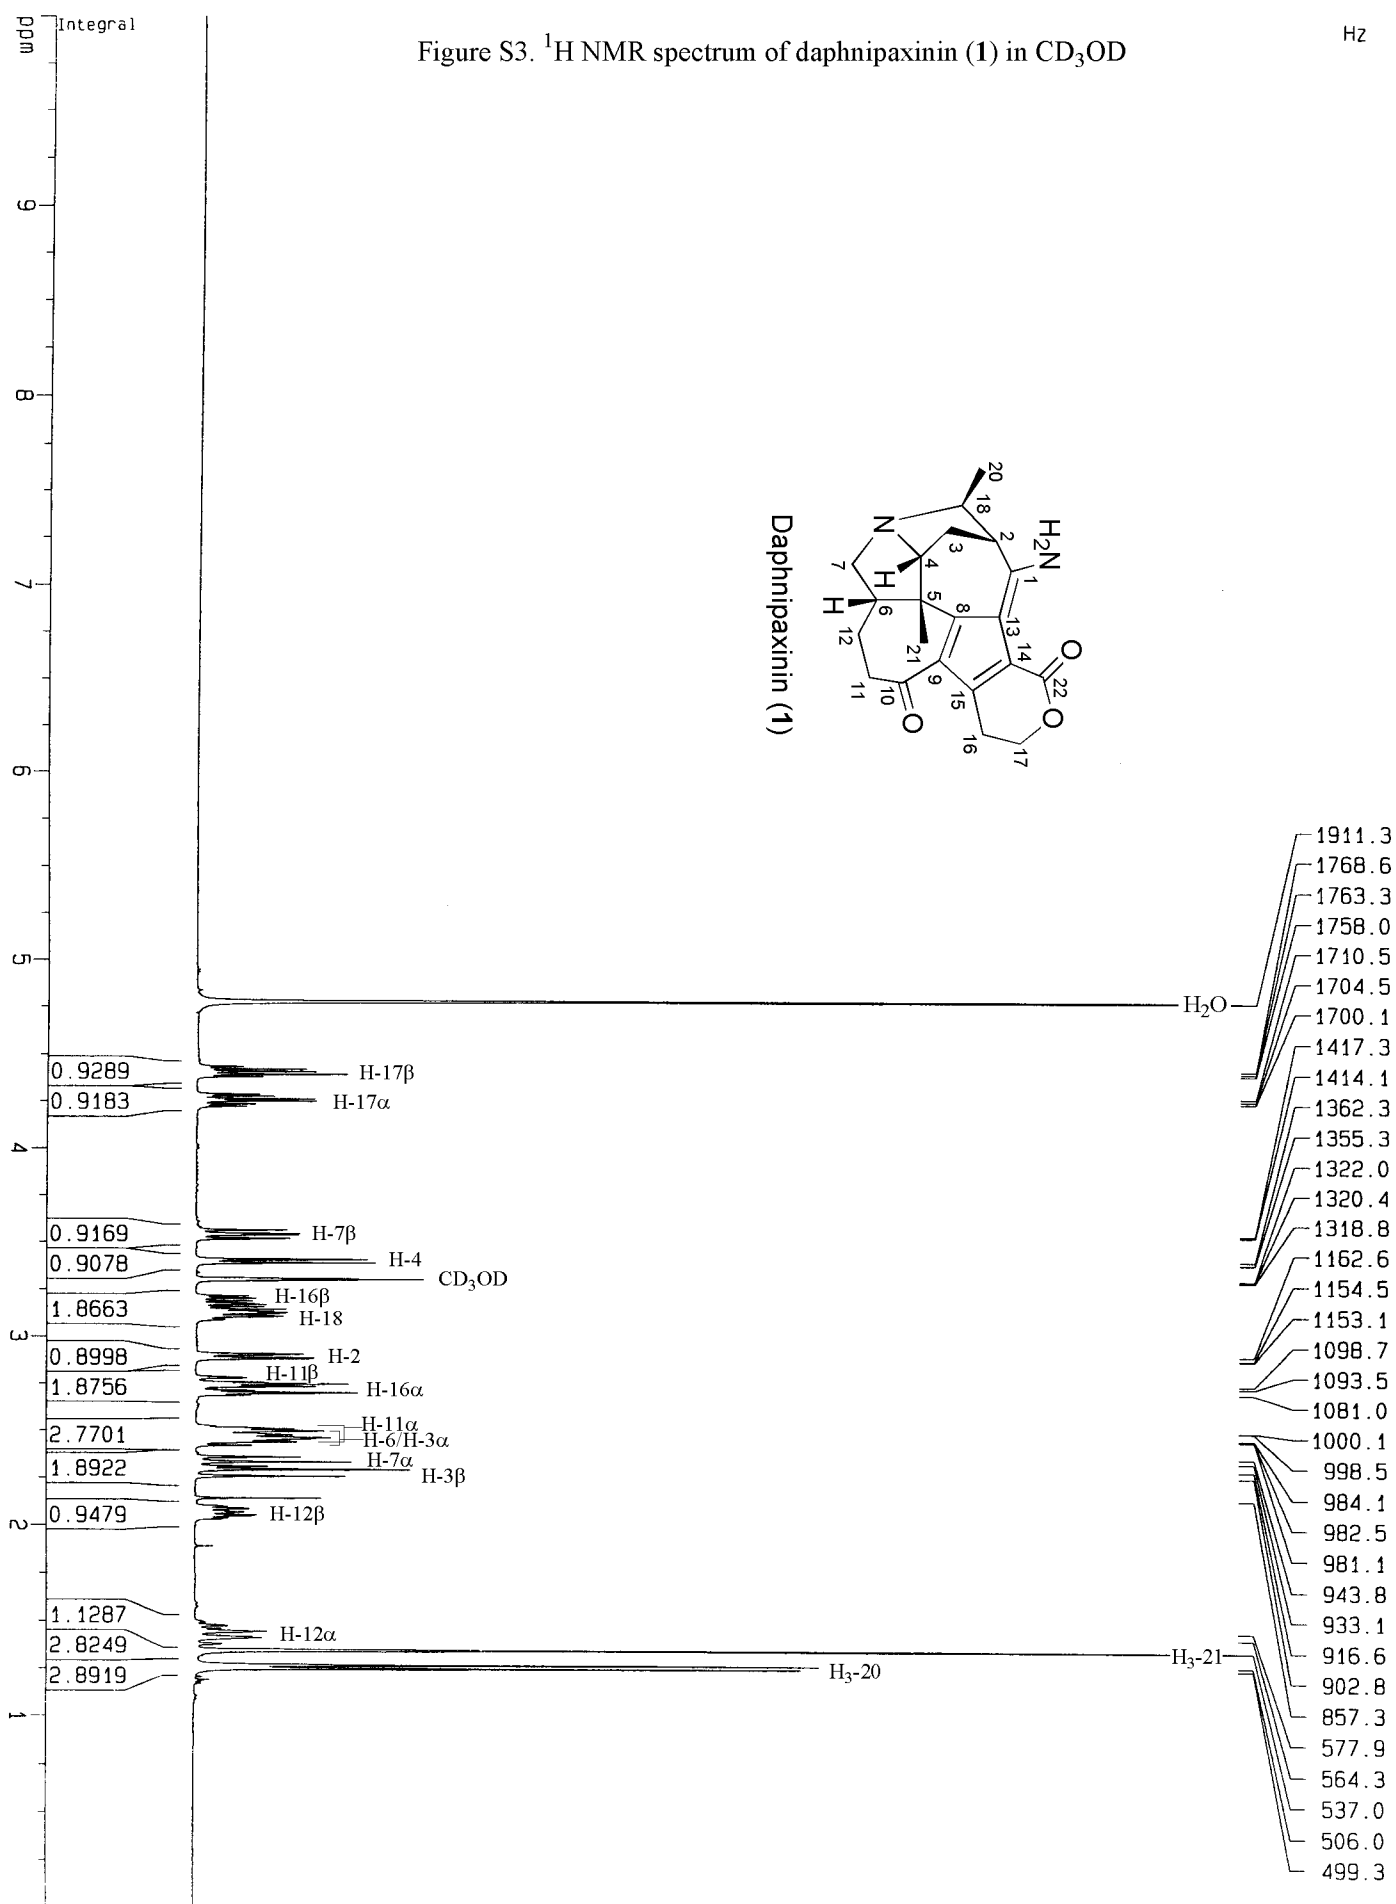

Figure S4.  $^{13}\text{C}$  NMR spectrum of daphnipaxinin (1) in  $\text{CD}_3\text{OD}$ 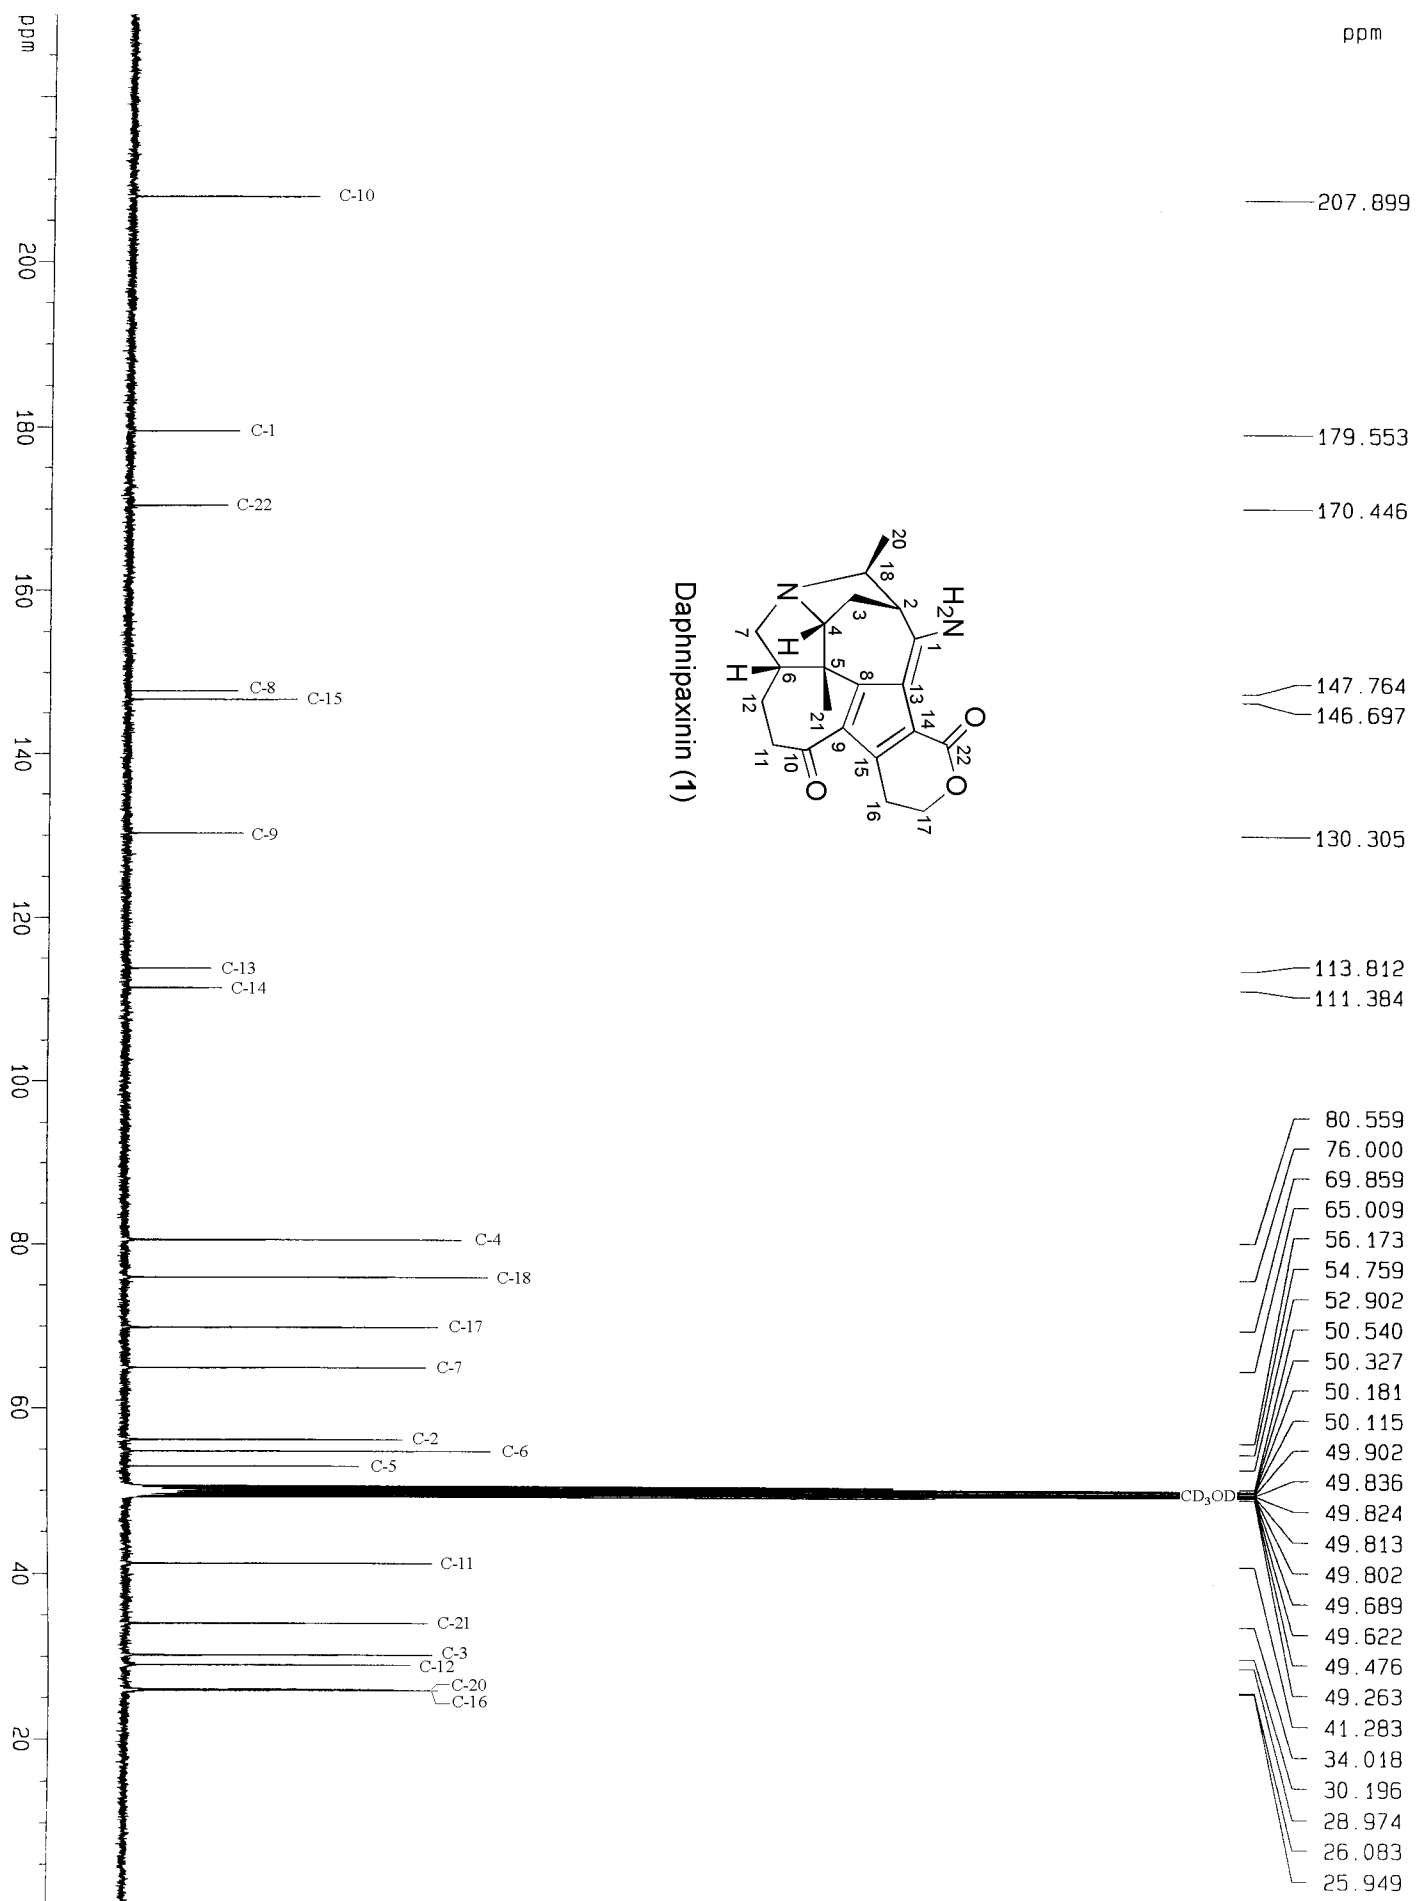

Figure S5. DEPT spectrum of daphnipaxinin (1) in CD<sub>3</sub>OD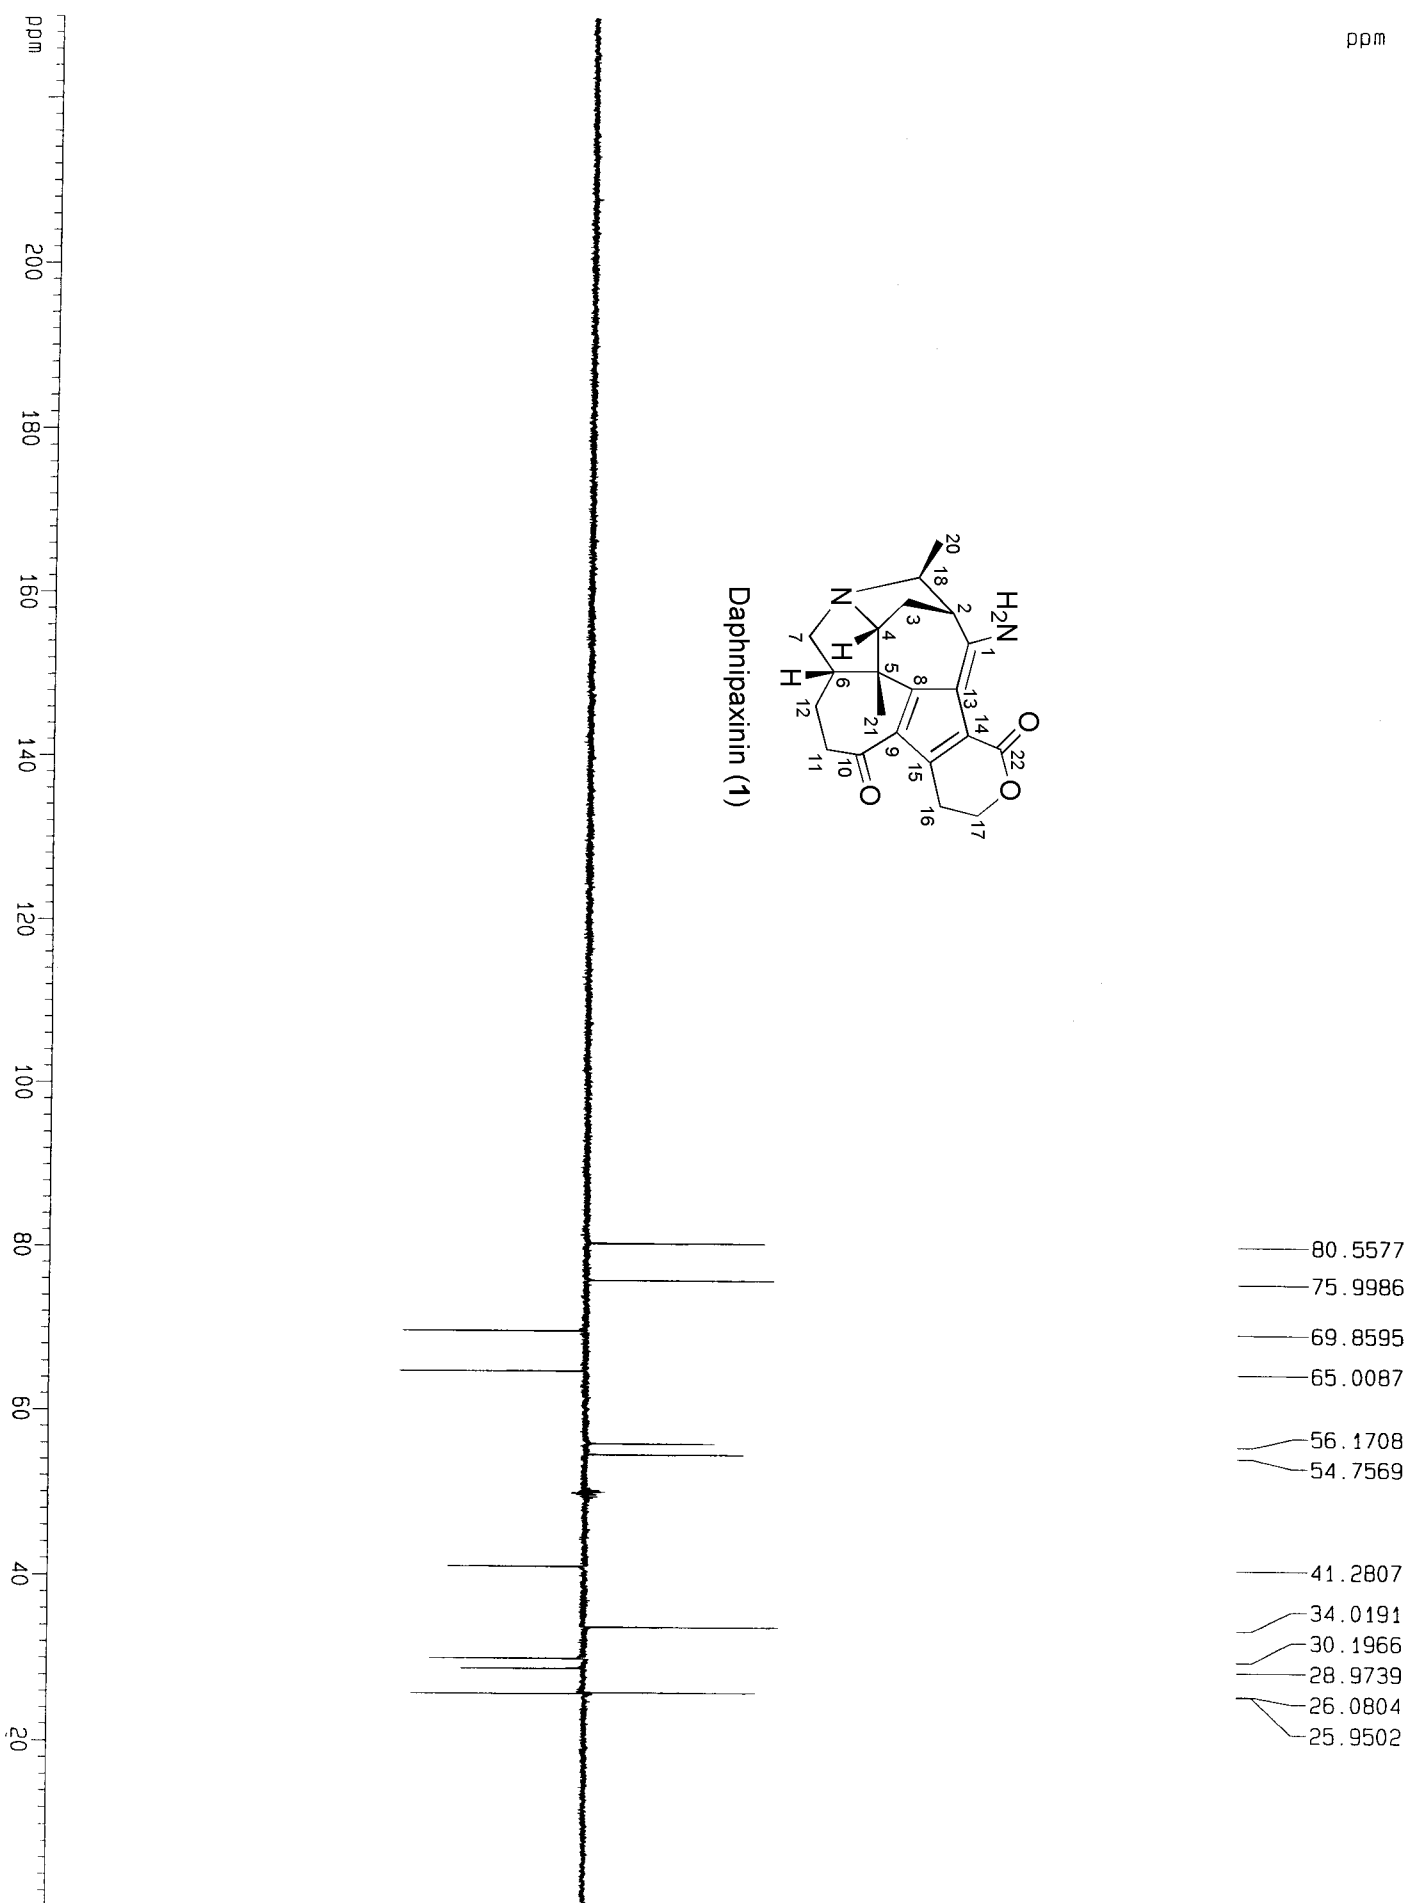

Figure S6. EIMS spectrum of daphnipaxinin (1)

SPEC: 132272 15-Dec-03 Elapse: 00:27.1 3  
Samp: POX-2 Start: 13:08:37 3  
Comm: Finnigan/MAT95/70eV/IST:200C/R:1000  
Mode: EI +VE +LMR BSCAN (EXP) UP LR NRM  
Oper: SIMM/WANG J. Client: S/N:SW01-0001 Inlet: 50 > 750  
Base: 352.1 Inten: 14789794 Masses: 50 > 750  
Norm: 352.1 RIC: 104626458 #peaks: 578  
Peak: 3000.00 nmol

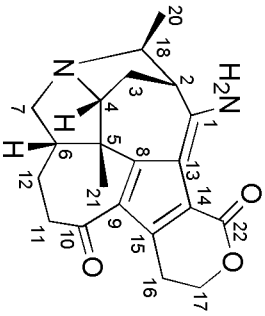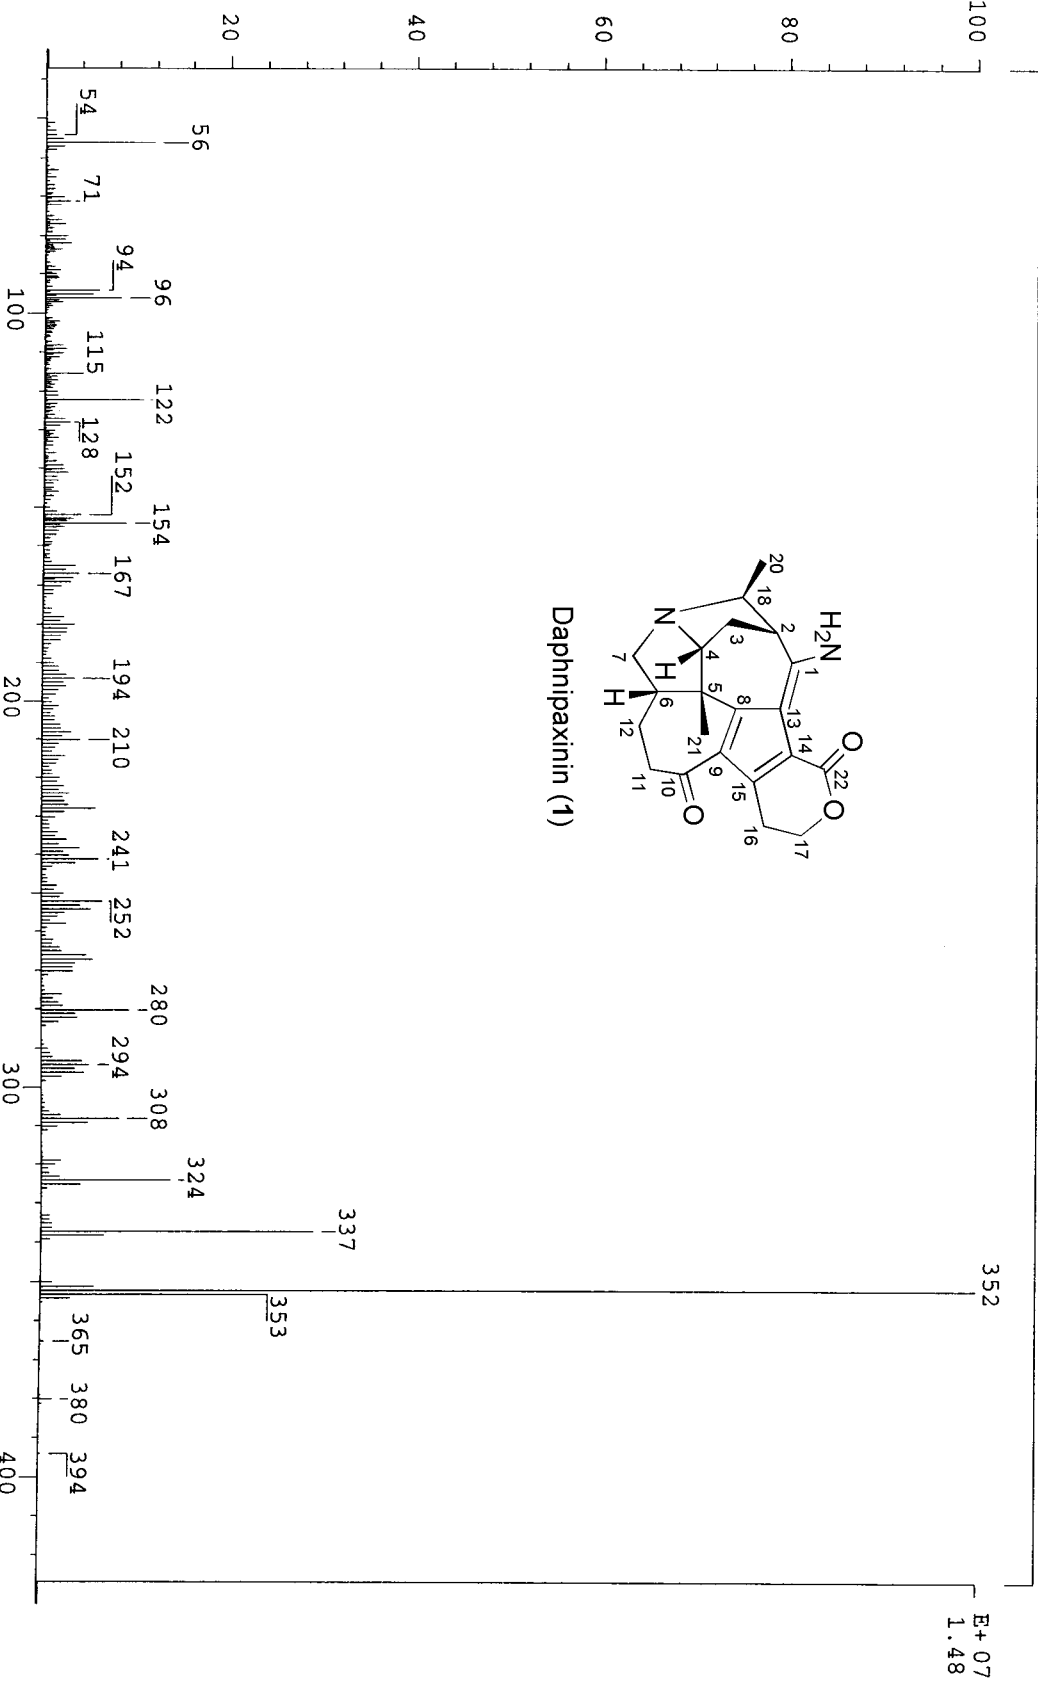

Figure S7. ESI-MS (positive) spectrum of daphnipaxinin (1)

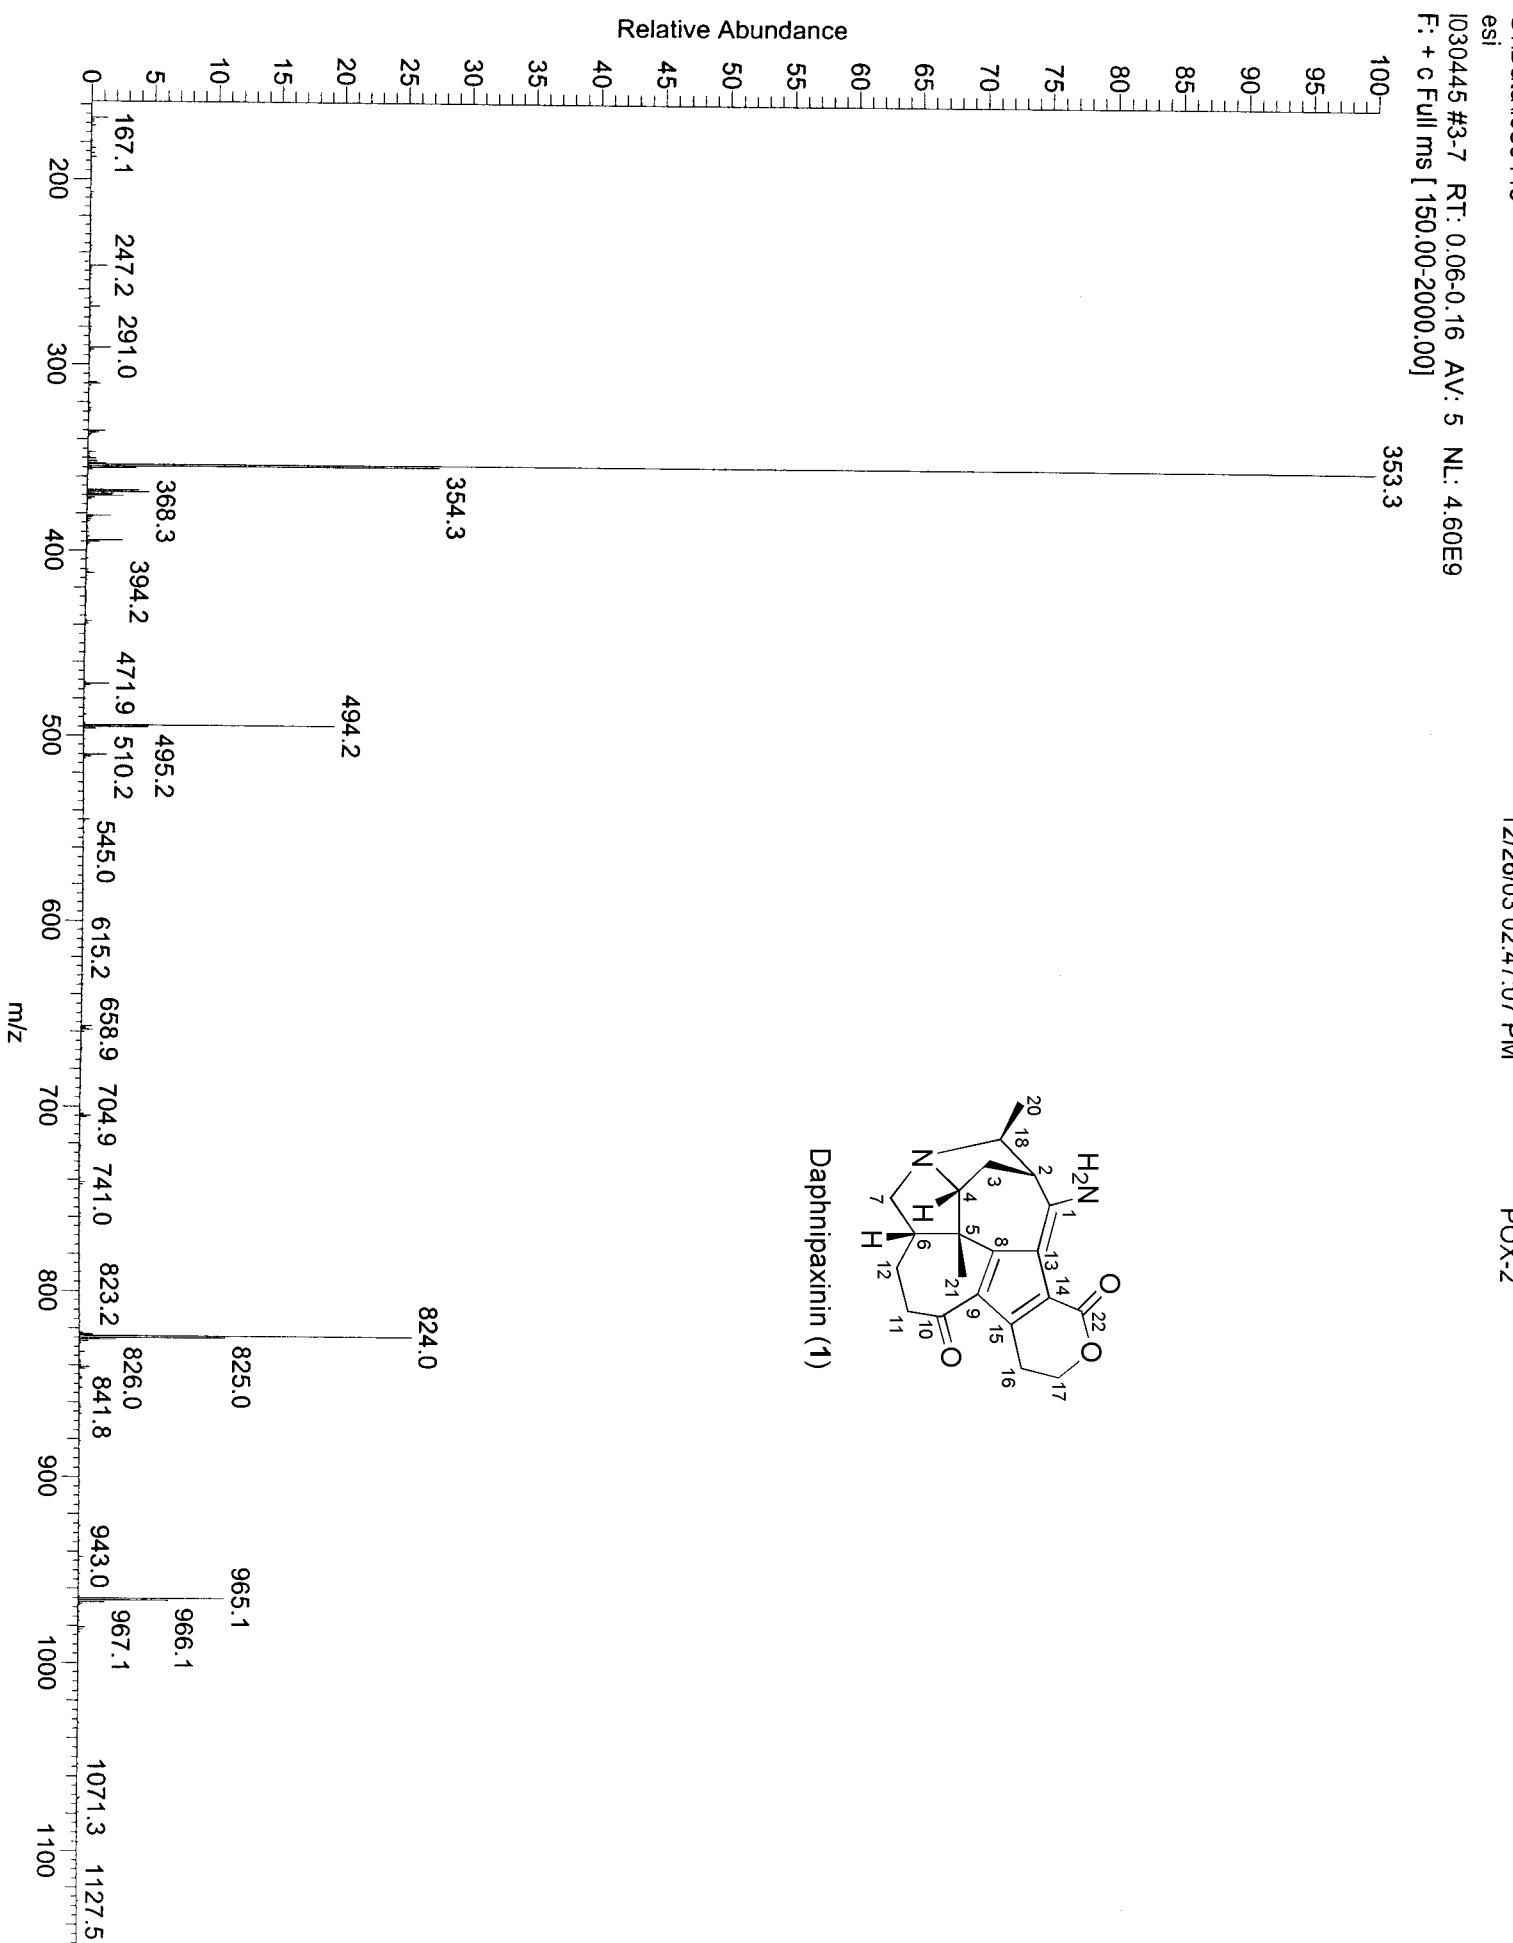

esi  
1030445 #33-42 RT: 0.62-0.76 AV: 10 NL: 1.04E7  
T: - c Full ms [50.00-1000.00]

12/29/03 02:47:07 PM

POX-2

Figure S8. ESI-MS (negative) spectrum of daphnipaxinin (1)

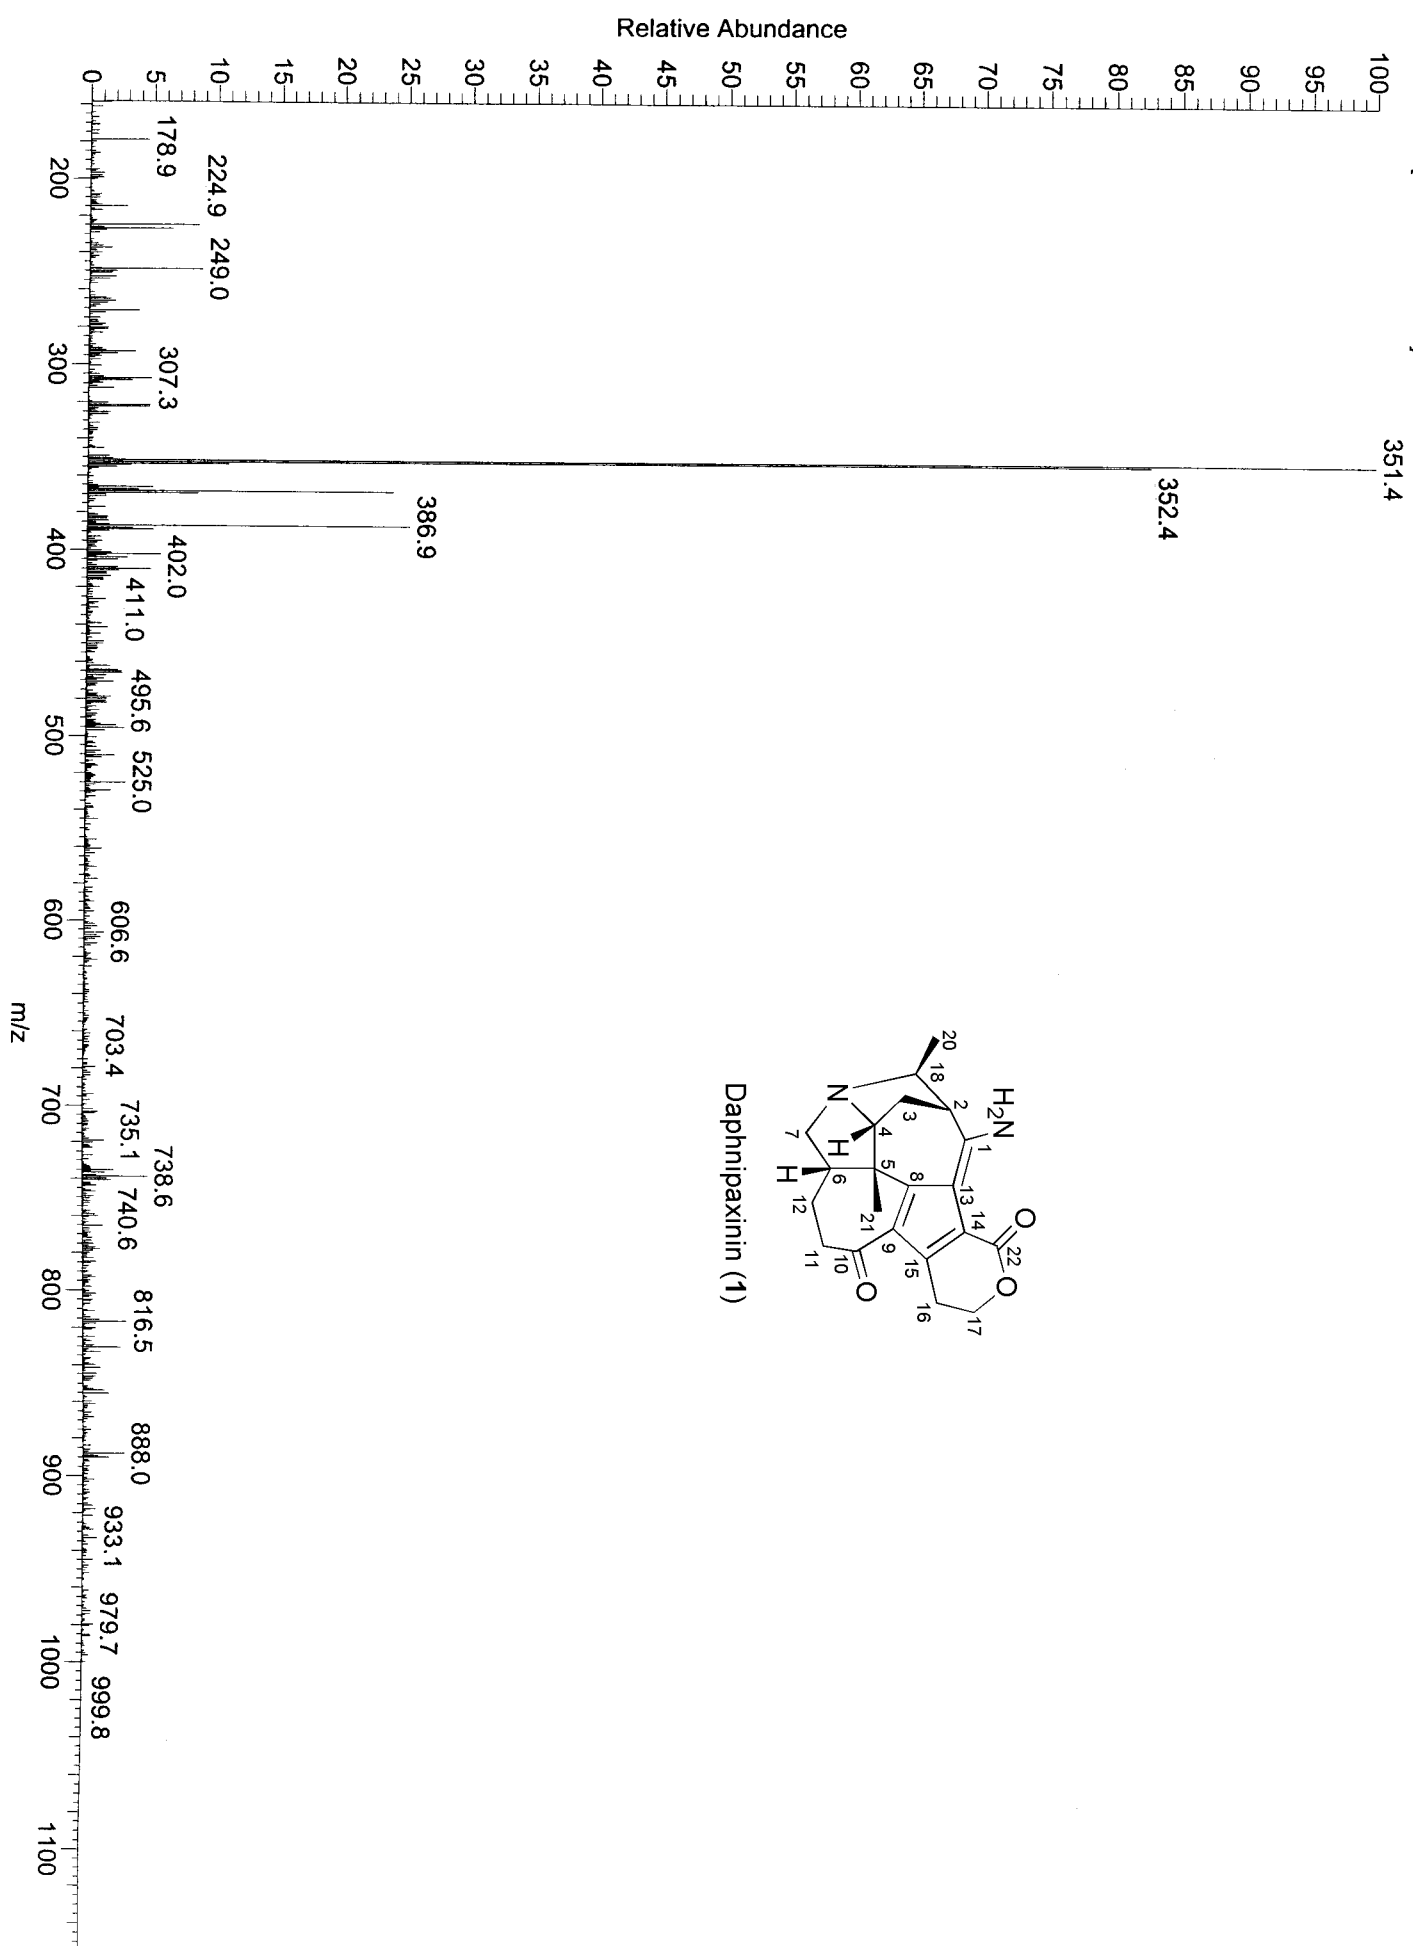

Daphnipaxinin (1)

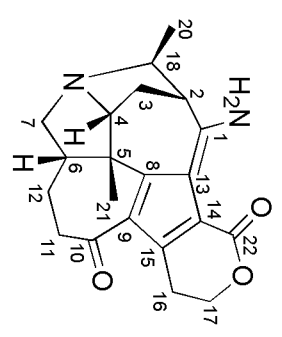





Figure S10. Expanded  $^1\text{H}$ - $^1\text{H}$  COSY spectrum of daphnipaxinin (1) in  $\text{CD}_3\text{OD}$  ( $\delta$  2.0-3.6).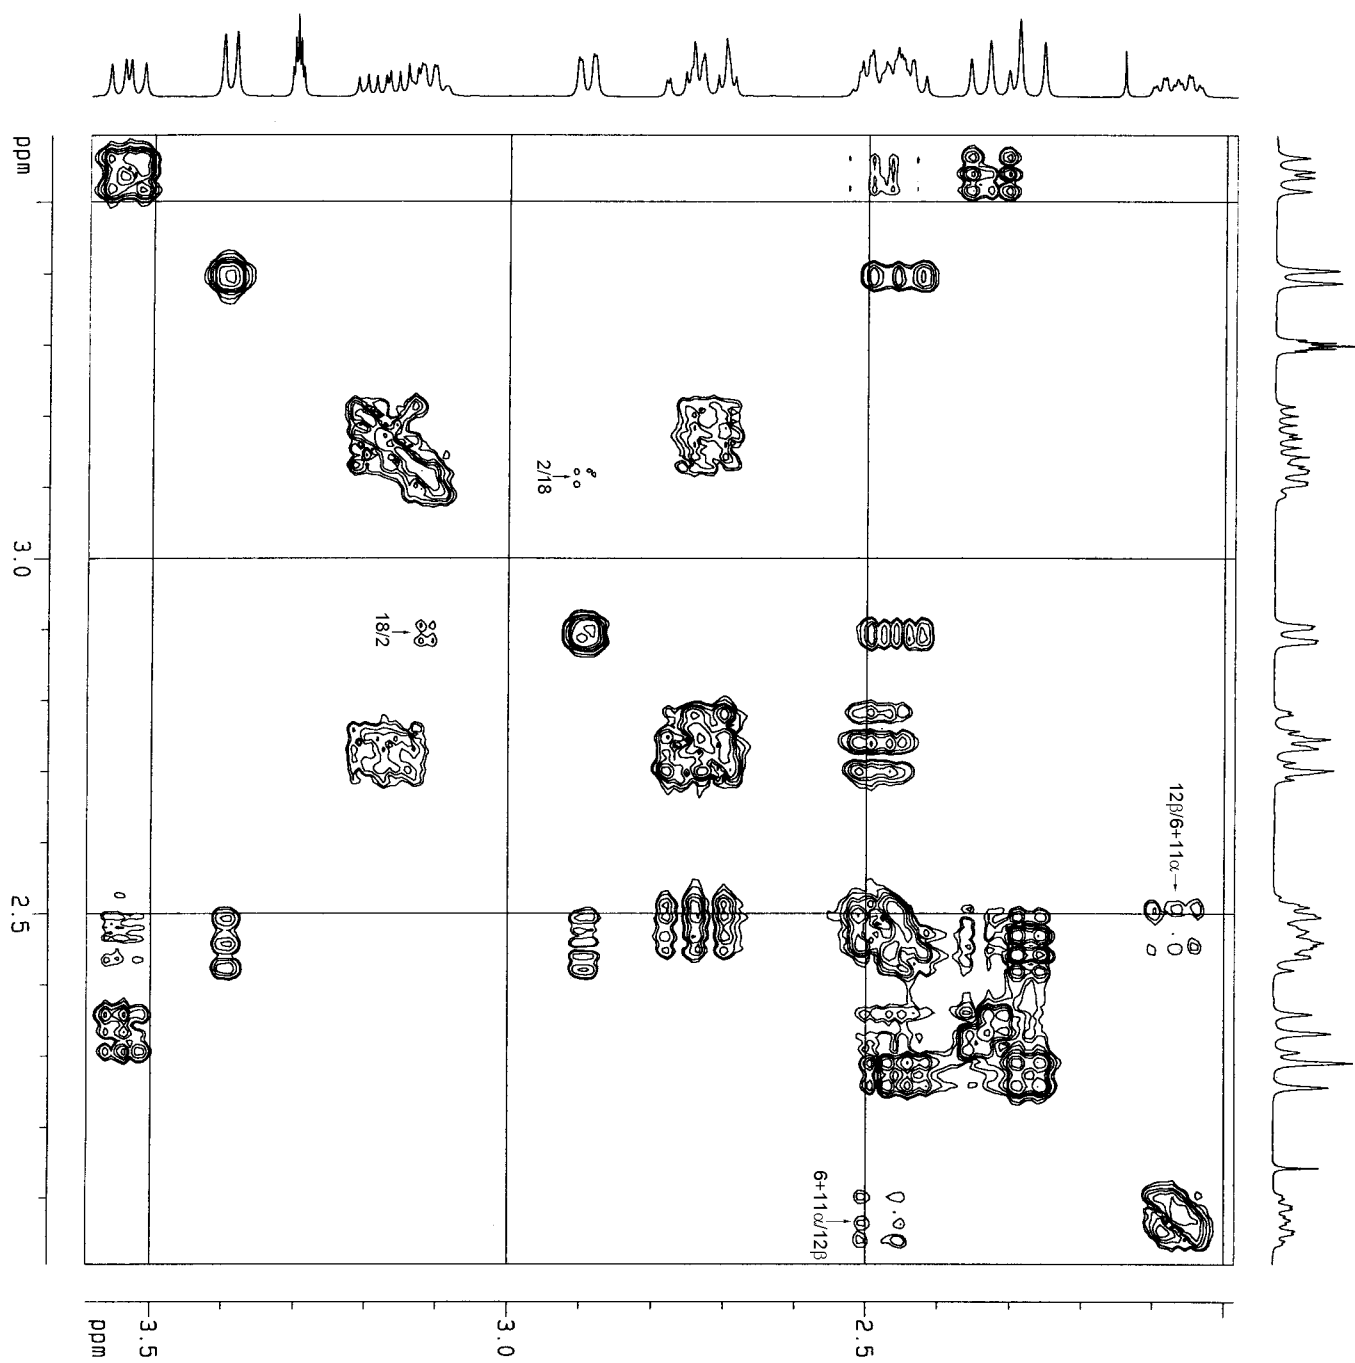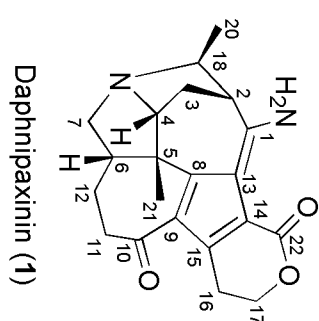

Figure S11. Expanded  $^1\text{H}$ - $^1\text{H}$  COSY spectrum of daphnipaxinin (1) in  $\text{CD}_3\text{OD}$  ( $\delta$  1.35-2.73).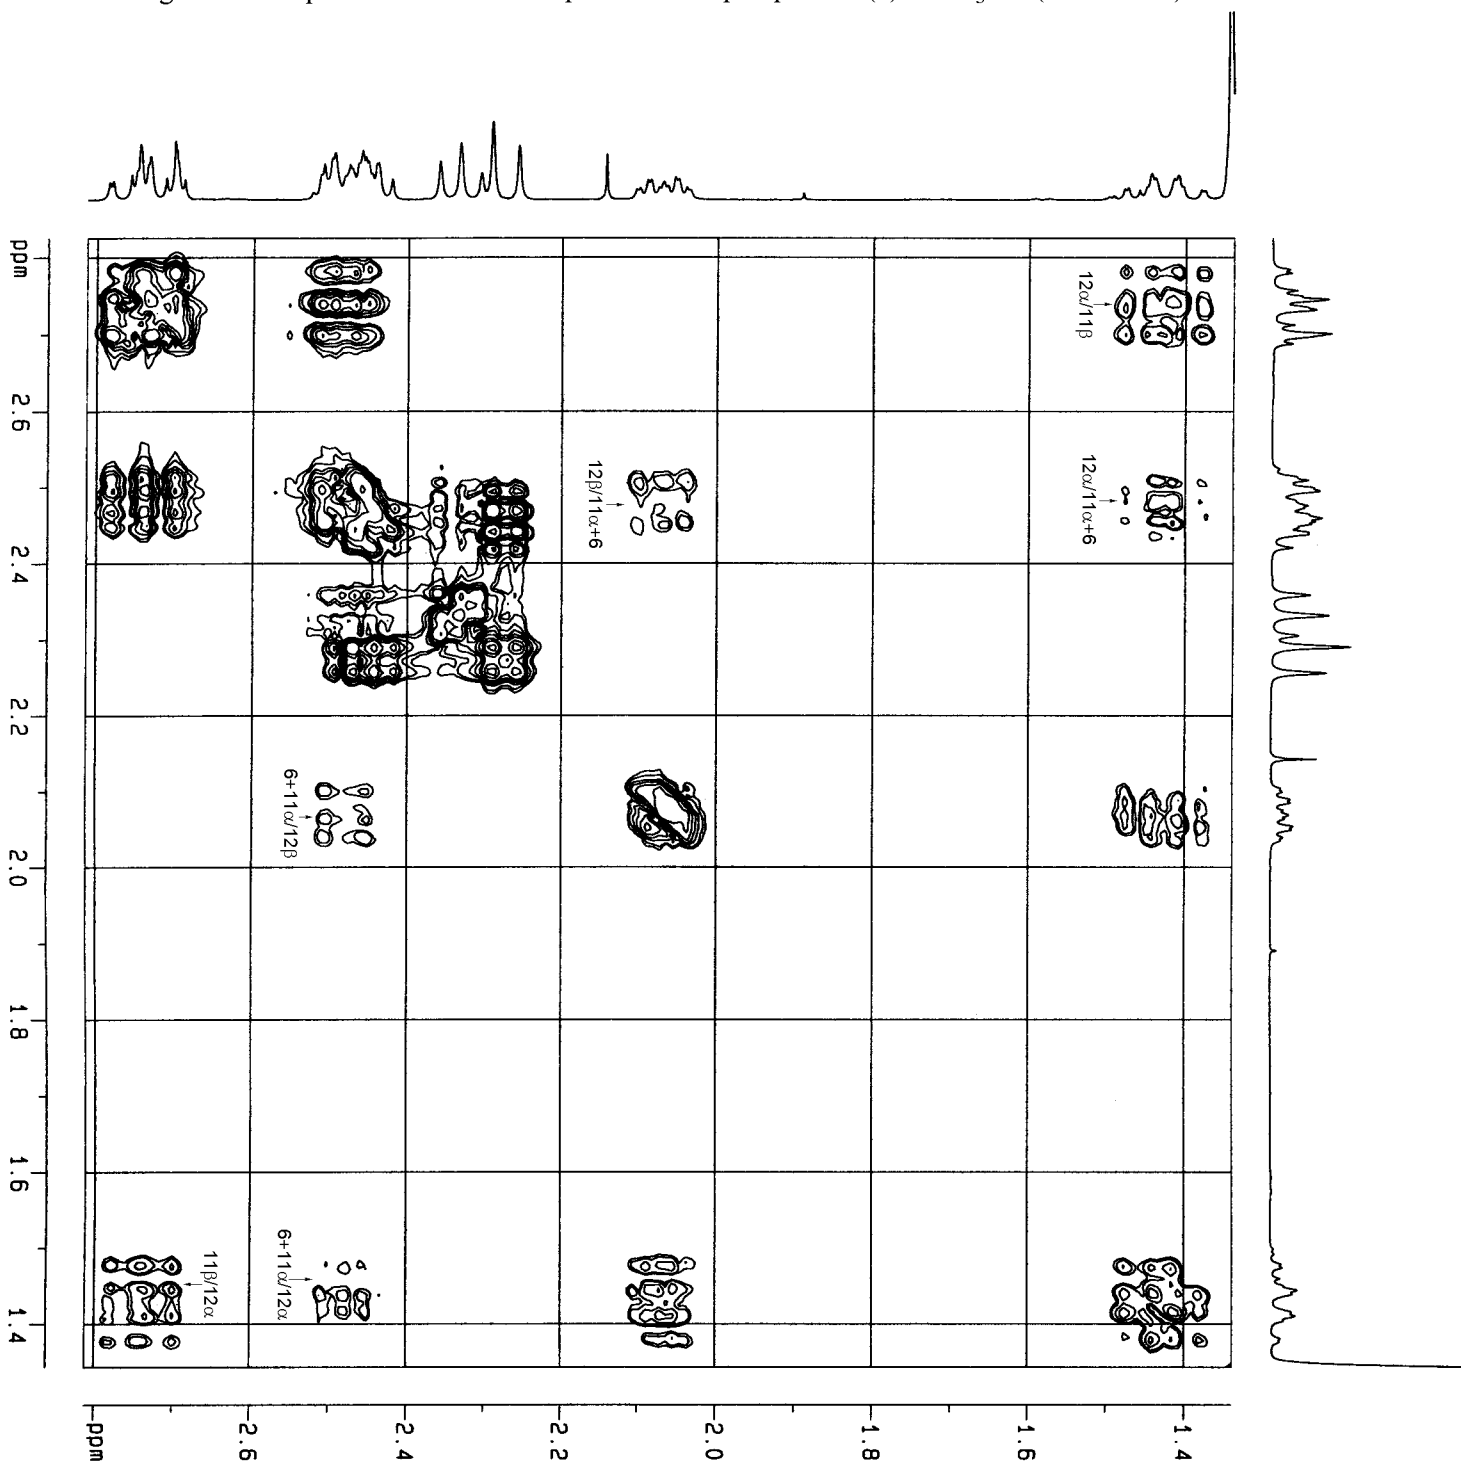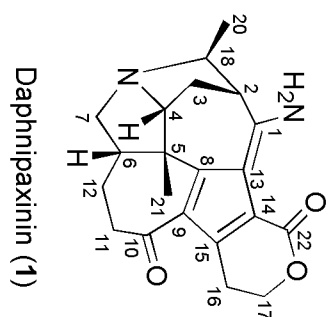



Figure S13. HMBC spectrum of daphnipaxinin (1) in CD<sub>3</sub>OD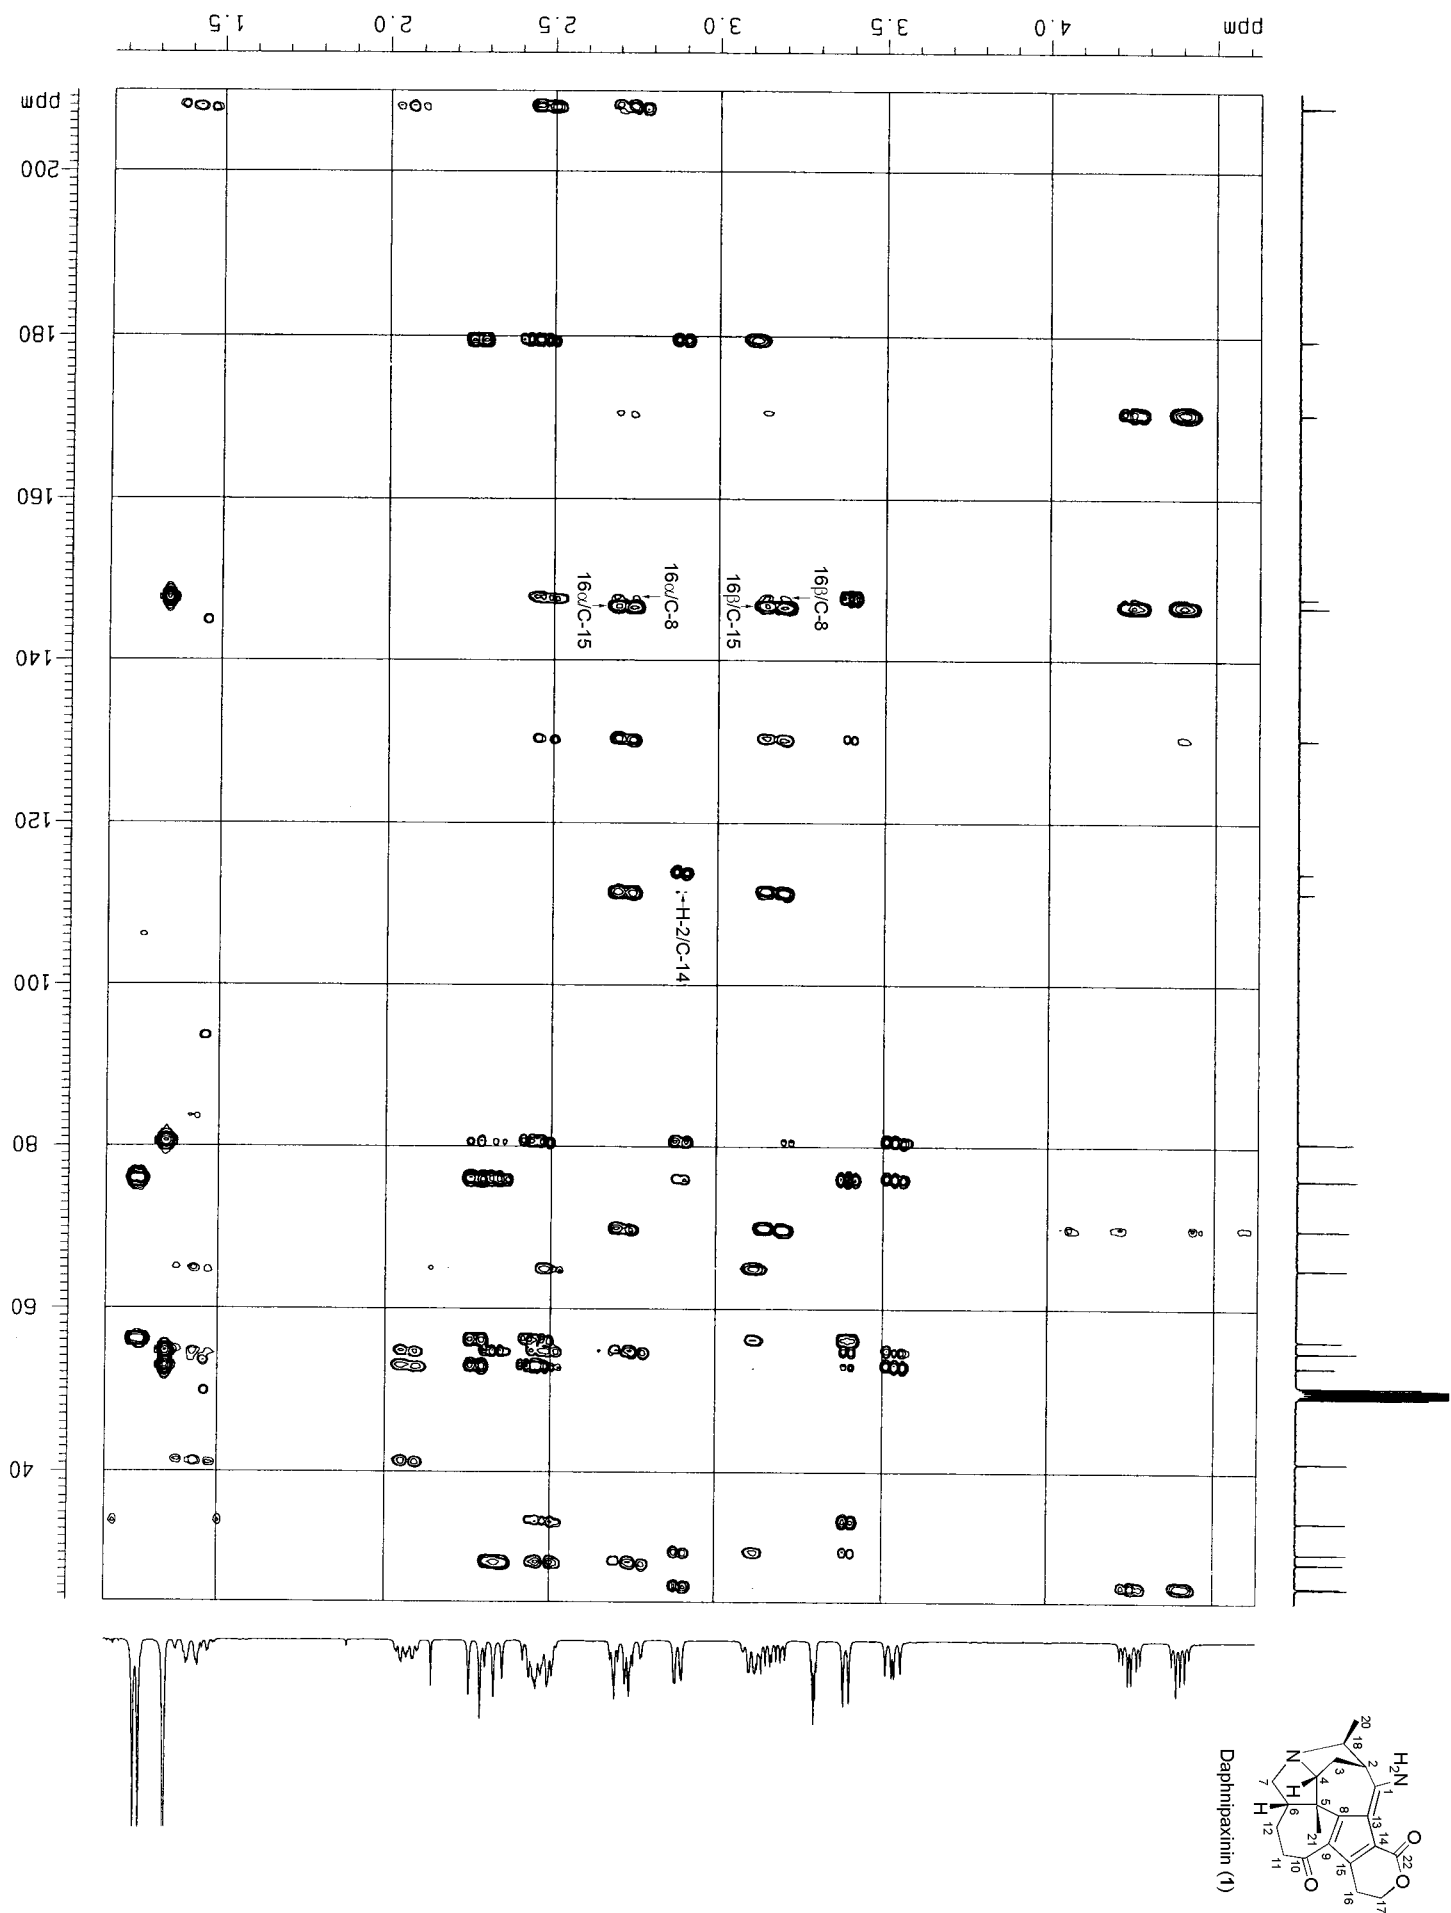

Figure S14. Expanded HMBC spectrum of daphnipaxinin (1) in CD<sub>3</sub>OD.  
( $\delta_{\text{H}}$  1.2-2.95 vs  $\delta_{\text{C}}$  109.5-210)

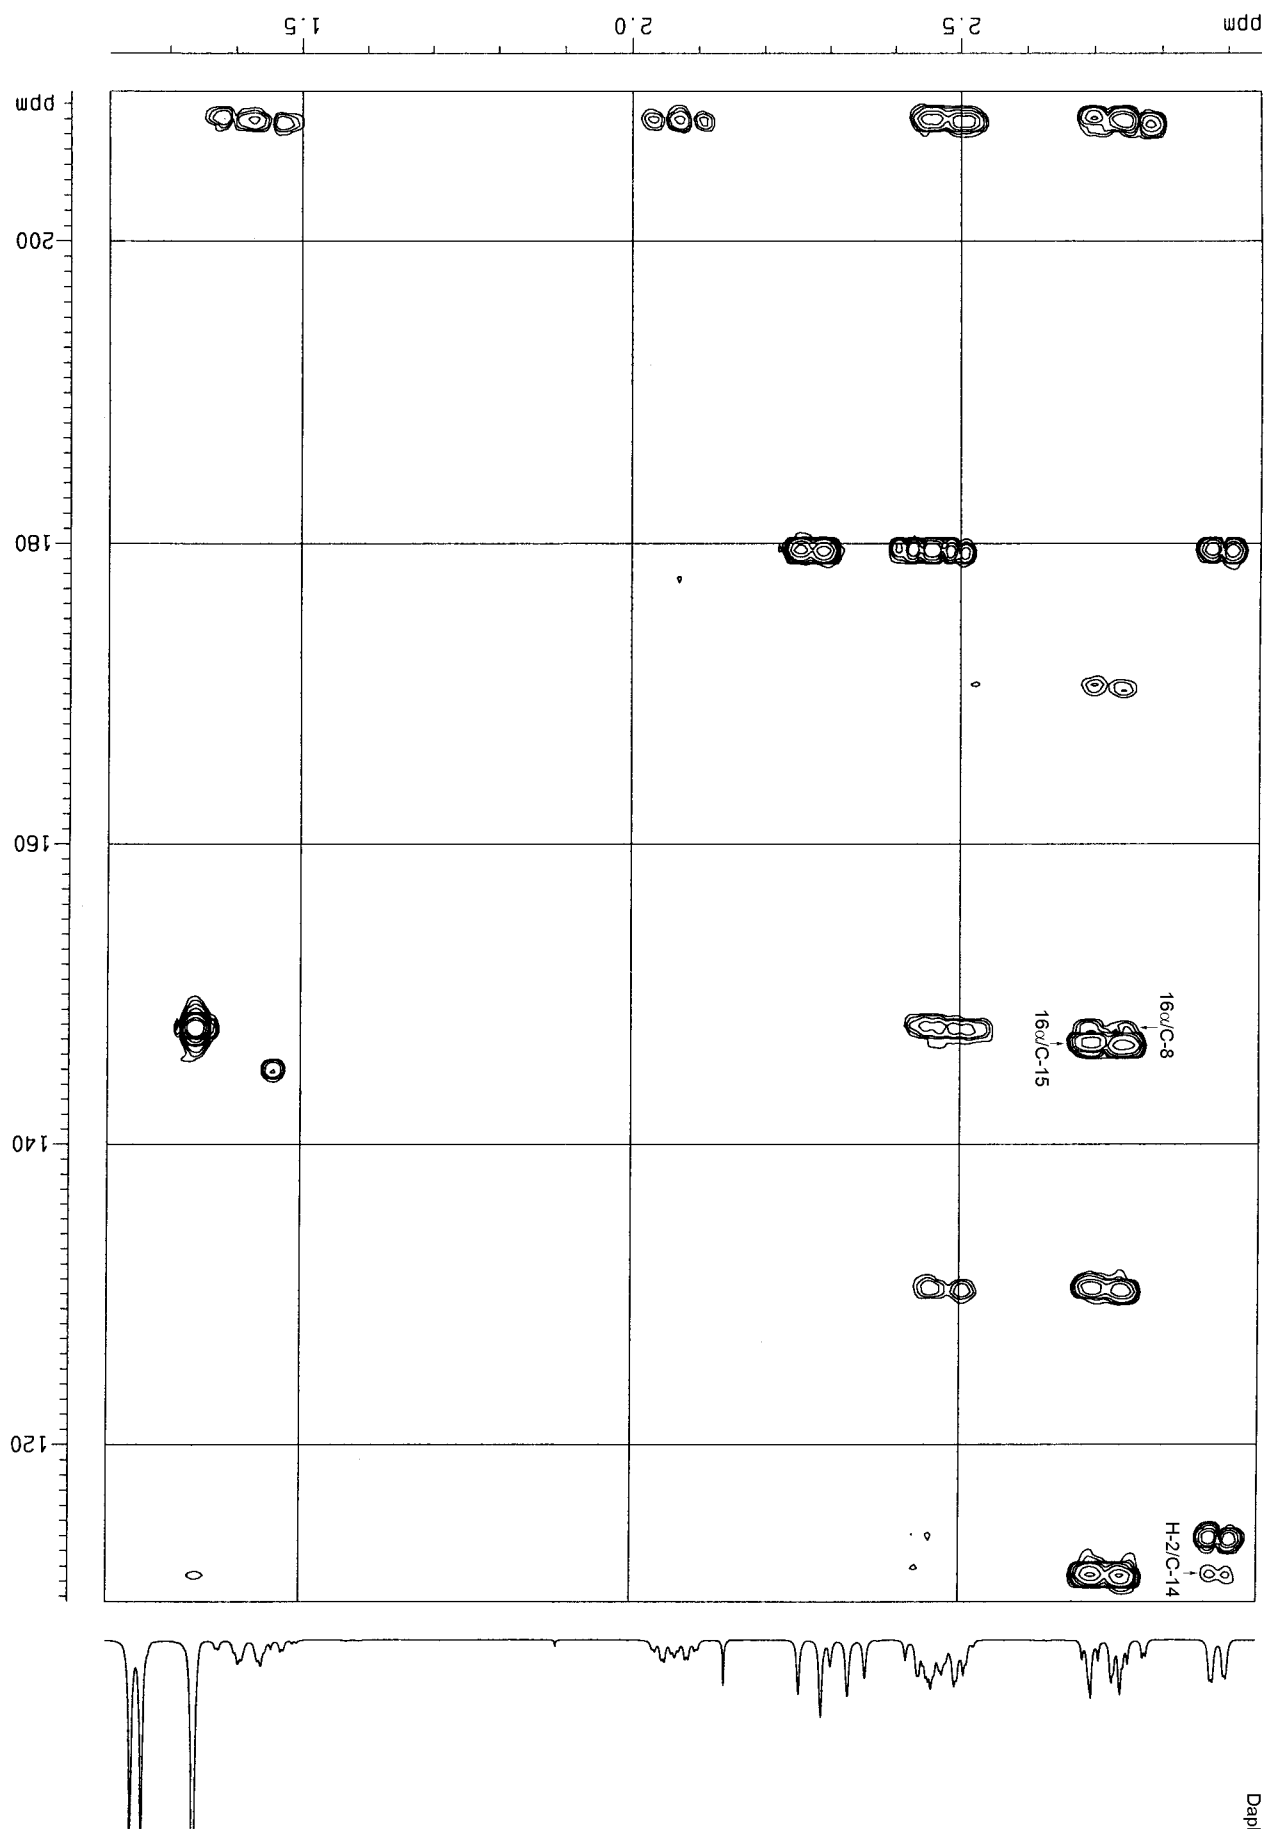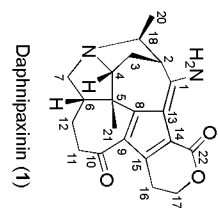

Figure S15. Expanded HMBC spectrum of daphnipaxinin (1) in CD<sub>3</sub>OD.  
( $\delta_{\text{H}}$  3.05-4.46 vs  $\delta_{\text{C}}$  109.5-210)

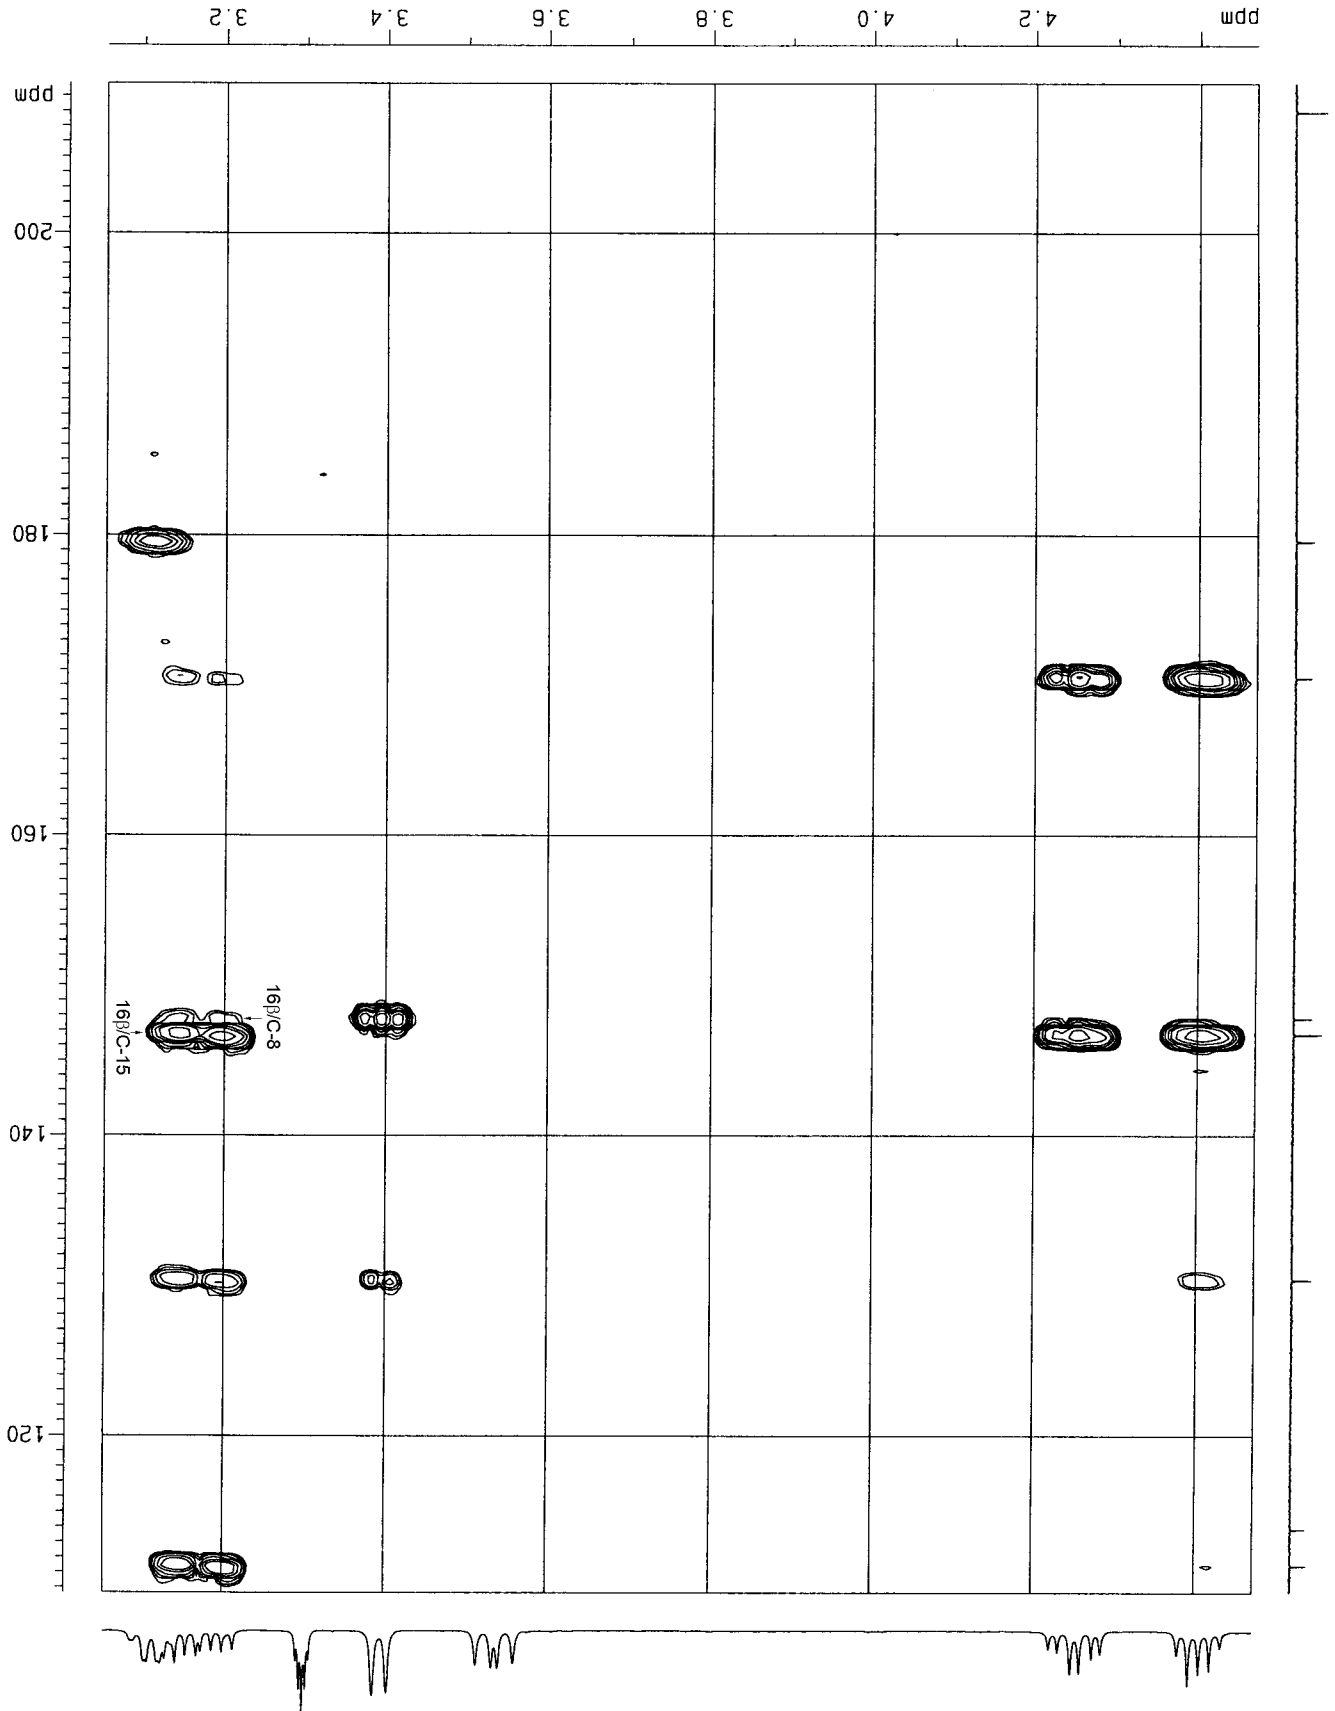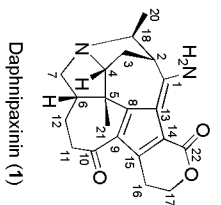

Figure S16. NOESY spectrum of daphnipaxinin (1) in CD<sub>3</sub>OD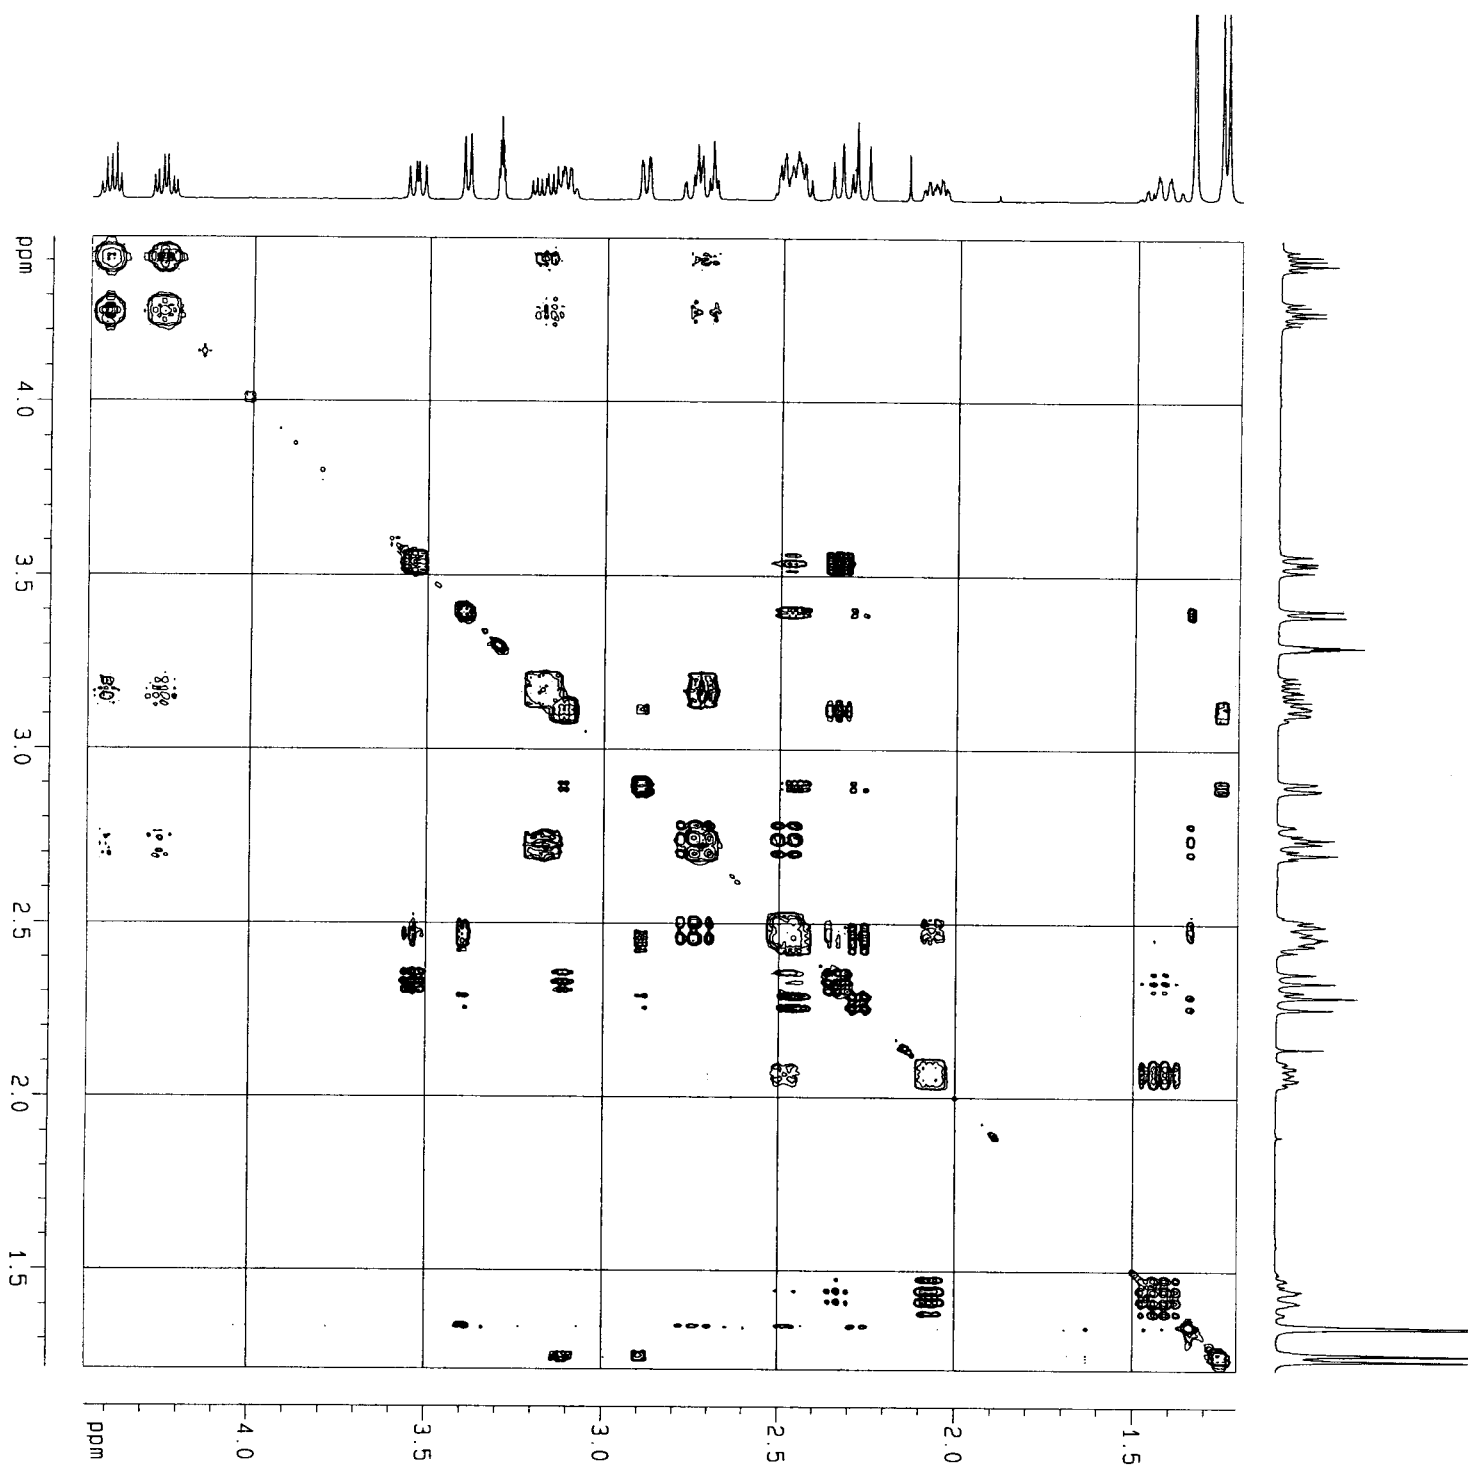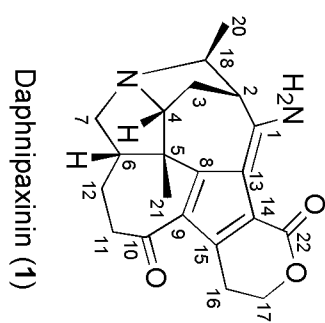



Figure S17. IR (KBr) spectrum of daphnipaxinin (1)

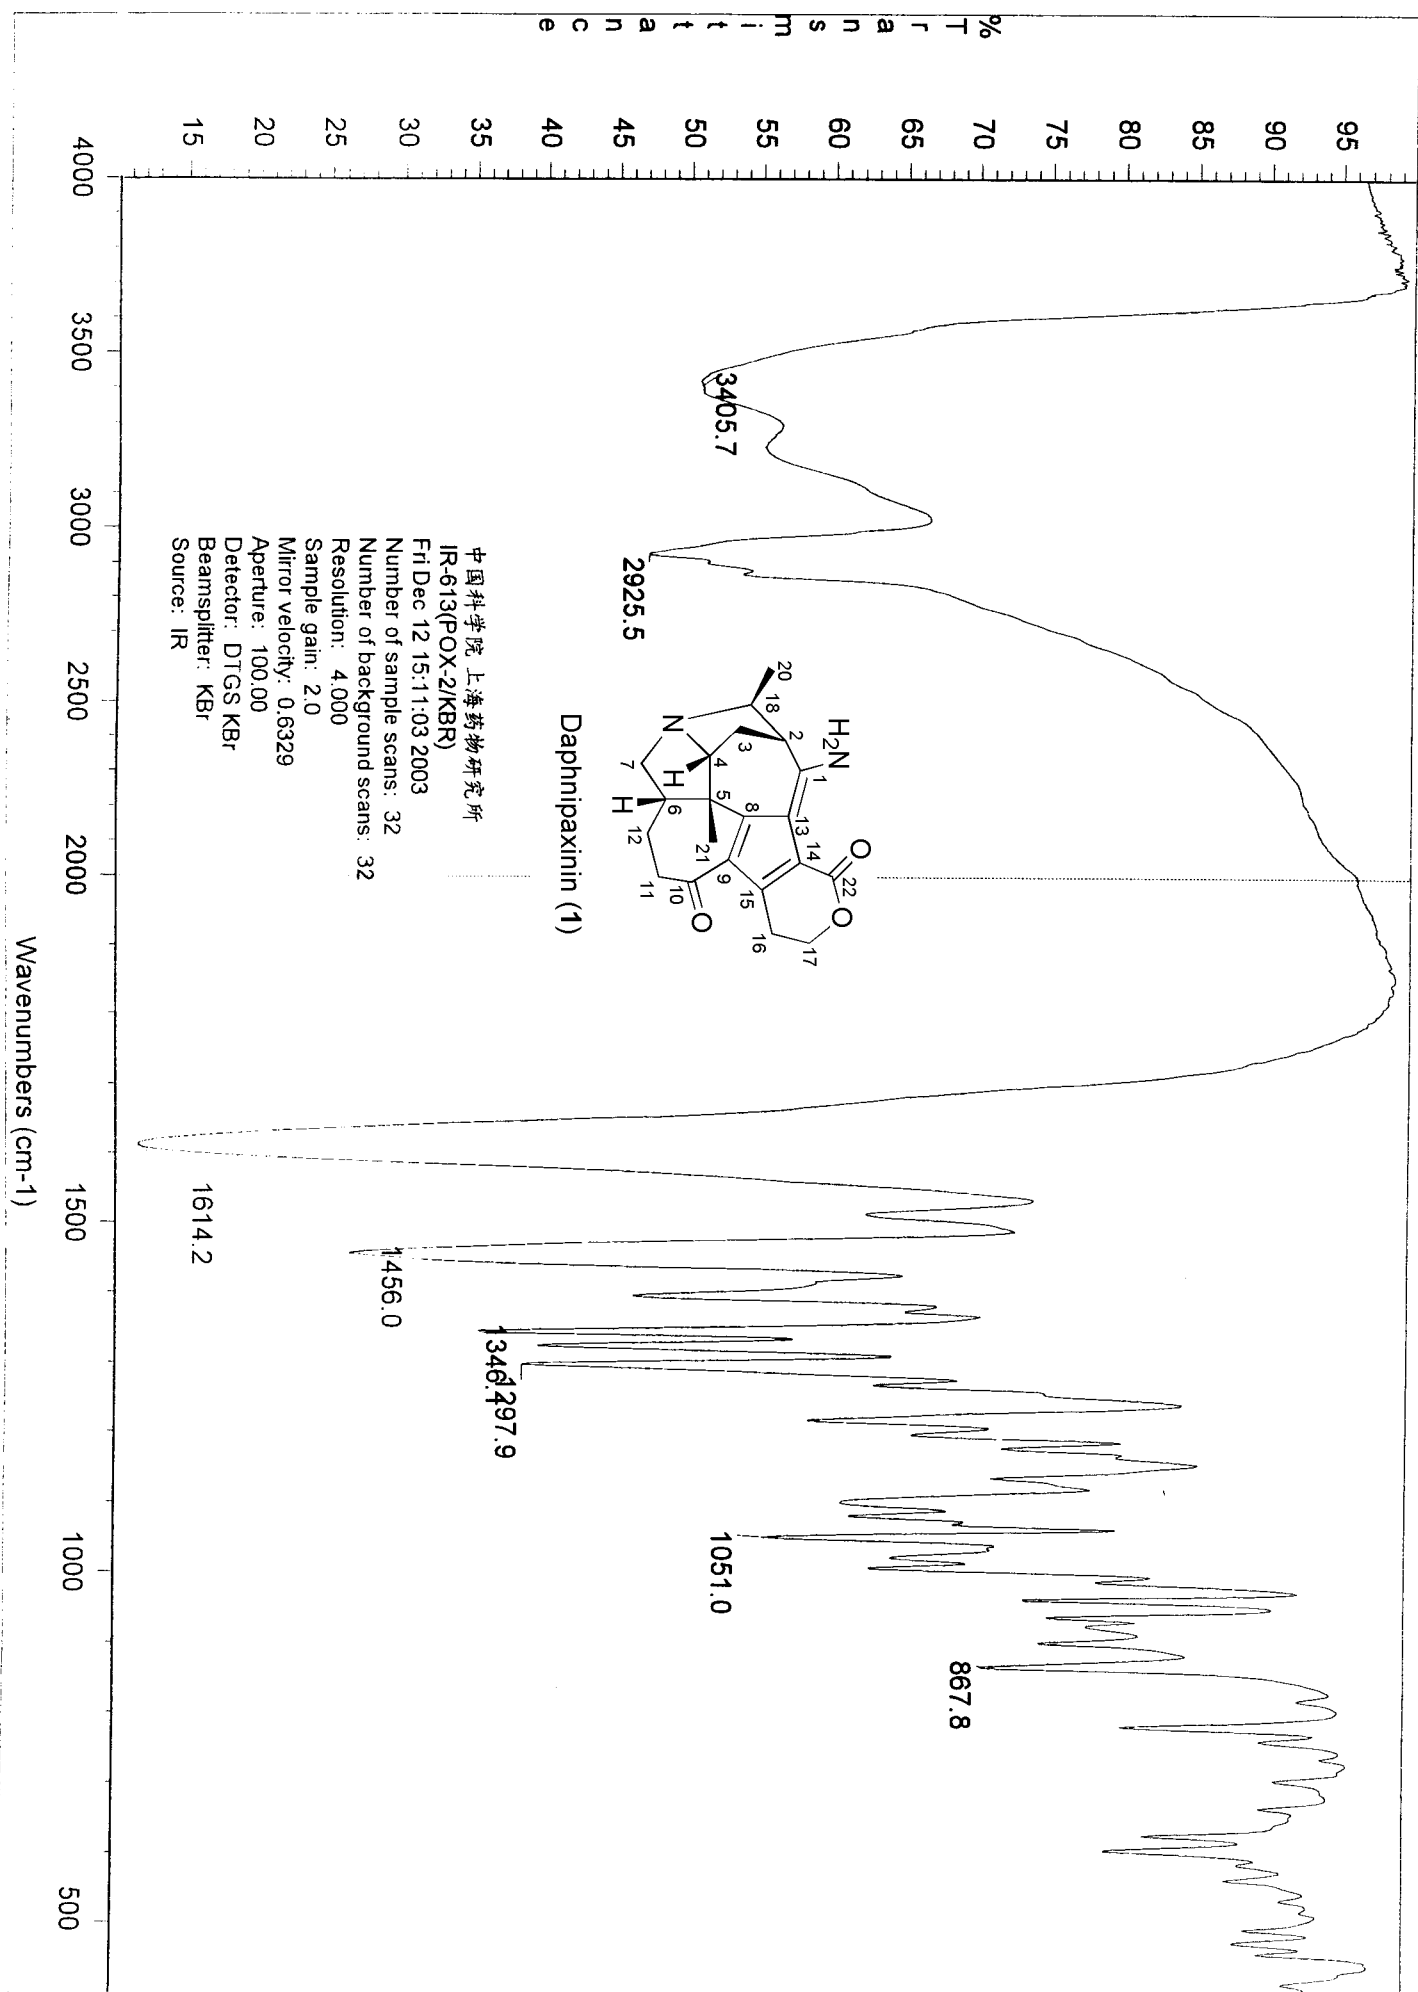

Supplement: Supplementary file 1 [file 5180590]
